# Supplementary material for: Classroom Movement Breaks Reduce Sedentary Behavior and Increase Concentration, Alertness and Enjoyment during University Classes: A Mixed-Methods Feasibility Study
Source: MDPI journal article supplement (doi:10.3390/ijerph18115589), 2021-05-24
Supplement: s1 [file s1]

## Participant questionnaire

Student number: \_\_\_\_\_

Ethics reference number HEC19527

## Demographic details

What is your gender? ☐ Female ☐ Male ☐ Non-binary; fluid; queer ☐ Prefer not to answer

What is your current age? \_\_\_\_\_years

Are you enrolled as an international student? ☐ Yes ☐ No

What physiotherapy course are you enrolled into?

☐ Graduate Entry Masters Program

☐ Bachelor of Applied Sciences and Master of Physiotherapy Program

Are you a Bendigo or Bundoora student?

☐ Bendigo

☐ Bundoora

## Week 2

### Class 1

*Please indicate your overall perceived level of alertness, concentration and enjoyment throughout the class by drawing a line at the appropriate point on each line below.*

**Class: EBP / CDM (please circle)**

**Movement breaks: Yes/No (please circle)**

Overall level of mental alertness (your ability to think quickly and notice things)

0 \_\_\_\_\_ 10  
 Least alert \_\_\_\_\_ Most alert

Overall level of concentration (your ability to focus your attention without getting distracted)

0 \_\_\_\_\_ 10  
 Least concentration \_\_\_\_\_ Most concentration

Overall level of enjoyment

0 \_\_\_\_\_ 10  
 Least enjoyable \_\_\_\_\_ Most enjoyable

### Class 2

**Class: EBP / CDM (please circle)**

**Movement breaks: Yes/No (please circle)**

Overall level of mental alertness (your ability to think quickly and notice things)

0 \_\_\_\_\_ 10  
 Least alert \_\_\_\_\_ Most alert

Overall level of concentration (your ability to focus your attention without getting distracted)

0 \_\_\_\_\_ 10  
 Least concentration \_\_\_\_\_ Most concentration

Overall level of enjoyment

0 \_\_\_\_\_ 10  
 Least enjoyable \_\_\_\_\_ Most enjoyable

## Week 3

### Class 1

*Please indicate your overall perceived level of alertness, concentration and enjoyment throughout the class by drawing a line at the appropriate point on each line below.*

**Class: EBP / CDM (please circle)**

**Movement breaks: Yes/No (please circle)**

Overall level of mental alertness (your ability to think quickly and notice things)

0 \_\_\_\_\_ 10  
Least alert \_\_\_\_\_ Most alert

Overall level of concentration (your ability to focus your attention without getting distracted)

0 \_\_\_\_\_ 10  
Least concentration \_\_\_\_\_ Most concentration

Overall level of enjoyment

0 \_\_\_\_\_ 10  
Least enjoyable \_\_\_\_\_ Most enjoyable

### Class 2

**Class: EBP / CDM (please circle)**

**Movement breaks: Yes/No (please circle)**

Overall level of mental alertness (your ability to think quickly and notice things)

0 \_\_\_\_\_ 10  
Least alert \_\_\_\_\_ Most alert

Overall level of concentration (your ability to focus your attention without getting distracted)

0 \_\_\_\_\_ 10  
Least concentration \_\_\_\_\_ Most concentration

Overall level of enjoyment

0 \_\_\_\_\_ 10  
Least enjoyable \_\_\_\_\_ Most enjoyable

## Week 4

### Class 1

*Please indicate your overall perceived level of alertness, concentration and enjoyment throughout the class by drawing a line at the appropriate point on each line below.*

**Class: EBP / CDM (please circle)**

**Movement breaks: Yes/No (please circle)**

Overall level of mental alertness (your ability to think quickly and notice things)

0 \_\_\_\_\_ 10  
 Least alert \_\_\_\_\_ Most alert

Overall level of concentration (your ability to focus your attention without getting distracted)

0 \_\_\_\_\_ 10  
 Least concentration \_\_\_\_\_ Most concentration

Overall level of enjoyment

0 \_\_\_\_\_ 10  
 Least enjoyable \_\_\_\_\_ Most enjoyable

### Class 2

**Class: EBP / CDM (please circle)**

**Movement breaks: Yes/No (please circle)**

Overall level of mental alertness (your ability to think quickly and notice things)

0 \_\_\_\_\_ 10  
 Least alert \_\_\_\_\_ Most alert

Overall level of concentration (your ability to focus your attention without getting distracted)

0 \_\_\_\_\_ 10  
 Least concentration \_\_\_\_\_ Most concentration

Overall level of enjoyment

0 \_\_\_\_\_ 10  
 Least enjoyable \_\_\_\_\_ Most enjoyable
